1                   **Contribution of pretomanid to novel regimens containing bedaquiline with**  
2                   **either linezolid or moxifloxacin and pyrazinamide in murine models of**  
3                   **tuberculosis**

4  
5 Jian Xu<sup>1,2</sup>, Si-Yang Li<sup>1</sup>, Deepak V. Almeida<sup>1</sup>, Rokeya Tasneen<sup>1</sup>, Kala Barnes-Boyle<sup>1</sup>, Paul  
6 J. Converse<sup>1</sup>, Anna M. Upton<sup>3</sup>, Khisimuzi Mdluli<sup>3\*</sup>, Nader Fotouhi<sup>3</sup>, Eric L.  
7 Nuermberger<sup>1,4#</sup>

8  
9 <sup>1</sup>Center for Tuberculosis Research, Department of Medicine, Johns Hopkins University  
10 School of Medicine, Baltimore, Maryland, USA;

11 <sup>2</sup>Beijing Key Laboratory of Drug Resistance Tuberculosis Research, Beijing Tuberculosis  
12 and Thoracic Tumor Research Institute, and Beijing Chest Hospital, Capital Medical  
13 University, Beijing, China;

14 <sup>3</sup>Global Alliance for Tuberculosis Drug Development, New York, New York, USA;

15 <sup>4</sup>Department of International Health, Johns Hopkins Bloomberg School of Public Health,  
16 Baltimore, Maryland, USA

17  
18 \*Present address: The Bill & Melinda Gates Medical Research Institute, Cambridge,  
19 Massachusetts

20  
21 #Corresponding author: enuermb@jhmi.edu

22  
23  
24 **Running title:** Contribution of pretomanid to novel TB regimens

25  
26 **Keywords:** pretomanid, bedaquiline, linezolid, moxifloxacin, pyrazinamide, resistance,  
27 murine model

28

29 **Abstract**

30 Novel regimens combining bedaquiline and pretomanid with either linezolid (BPaL  
31 regimen) or moxifloxacin and pyrazinamide (BPaMZ regimen) shorten the treatment  
32 duration needed to cure TB in BALB/c mice compared to the first-line regimen and have  
33 yielded promising results in initial clinical trials. However, the independent contribution  
34 of the investigational new drug pretomanid to the efficacy of BPaMZ has not been  
35 examined and its contribution to BPaL has been examined only over the first 2 months of  
36 treatment. In the present study, the addition of pretomanid to BL increased bactericidal  
37 activity, prevented emergence of bedaquiline resistance, and shortened the duration  
38 needed to prevent relapse with drug-susceptible isolates by at least 2 months in BALB/c  
39 mice. Addition of pretomanid to BMZ resulted in a 1 log<sub>10</sub> greater CFU reduction after 1  
40 month of treatment and/or reduced the number of mice relapsing in each of 2 experiments  
41 in BALB/c mice and in immunocompromised nude mice. Bedaquiline-resistant isolates  
42 were found at relapse in only one BMZ-treated nude mouse. Treatment of infection with  
43 a pyrazinamide-resistant mutant in BALB/c mice with BPaMZ prevented selection of  
44 bedaquiline-resistant mutants and reduced the proportion of mice relapsing compared to  
45 BMZ alone. Among severely ill C3HeB/FeJ mice with caseous pneumonia and cavitation,  
46 BPaMZ increased median survival ( $\geq 60$  vs. 21 days) and reduced median lung CFU by  
47 2.4 log<sub>10</sub> at 1 month compared to BMZ. In conclusion, in 3 different mouse models,  
48 pretomanid contributed significantly to the efficacy of the BPaMZ and BPaL regimens,  
49 including restricting the selection of bedaquiline-resistant mutants.

50

51

52

53

54

55

56 The World Health Organization (WHO) estimates that 10.4 million people developed  
57 active tuberculosis (TB) in 2016 and 1.67 million people died from it (1). Nearly 500,000  
58 new cases of multidrug-resistant (MDR) TB occur annually, with an estimated treatment  
59 success rate of only 54% (1, 2). The current standard short-course regimen for  
60 drug-susceptible TB consisting of rifampin (RIF), isoniazid (INH), pyrazinamide (PZA),  
61 and ethambutol (EMB) (regimen abbreviated as RHZE) requires a 6-month treatment  
62 duration to provide sufficient population-level efficacy. It takes 9-24 months for regimens  
63 containing at least 4-6 drugs, including at least one injectable agent, to treat patients with  
64 MDR-TB (3). New regimens to shorten and simplify TB treatment are urgently needed. If  
65 such regimens do not contain INH or RIF, they may be applicable to both  
66 drug-susceptible and MDR-TB.

67 The combination of bedaquiline (BDQ) + pretomanid (PMD) + moxifloxacin (MXF) +  
68 PZA (regimen abbreviated as BPamZ) had superior bactericidal and sterilizing activity  
69 compared to RIF+INH+PZA in a murine model of TB, shortening the duration of  
70 treatment required to prevent relapse by 2.5-3.5 months (4). In the subsequent phase 2  
71 NC-005 trial (NCT02193776), PZA-susceptible MDR-TB patients receiving the BPamZ  
72 regimen had significantly faster sputum culture conversion than drug-susceptible TB  
73 patients receiving RIF+INH+PZA+EMB (5), suggesting that the results in mice may  
74 translate well to the clinic. A phase 3 trial evaluating the BPamZ regimen administered  
75 for 4 months in drug-susceptible TB patients and for 6 months in MDR-TB patients is  
76 now enrolling subjects (NCT03338621). The combination of BDQ + PMD + linezolid  
77 (LZD) (regimen abbreviated as BPaL) also has superior bactericidal and sterilizing  
78 activity compared to RHZE in a murine TB model (6). Although it does not cure mice as  
79 rapidly as BPamZ, this regimen has a greater spectrum of activity and has recently shown  
80 promising efficacy as an all-oral 6-month regimen in patients (Nix-TB trial) with  
81 extensively drug-resistant TB (7).

82 It is important to understand the contribution of each component in a regimen that is

83 moving forward in the clinic. The independent contributions of BDQ, MXF and PZA to  
84 the efficacy of BPamZ were previously demonstrated in a BALB/c mouse TB model (4).  
85 Furthermore, receipt of the BPamZ regimen was associated with numerically higher  
86 sputum conversion rates in PZA-susceptible MDR-TB patients compared to  
87 drug-susceptible TB patients receiving the BDQ+PMD+PZA regimen and PZA-resistant  
88 MDR-TB patients receiving BPamZ in the NC-005 trial (5), indicating the contribution  
89 of MXF and PZA, respectively. In addition, the sputum conversion rates after 2 months  
90 of treatment with BPamZ in the NC-005 trial were higher than those in MDR-TB patients  
91 receiving the same regimen without BDQ in the NC-002 trial (8), indicating the  
92 contribution of BDQ.

93 PMD is a nitroimidazole drug that is activated within *Mycobacterium tuberculosis* by  
94 the bacterial deazaflavin-dependent nitroreductase Ddn and has bactericidal activity  
95 against replicating and non-replicating bacilli (9, 10). The contribution of this  
96 investigational new drug to the BPamZ regimen has yet to be confirmed directly in  
97 pre-clinical or clinical studies. Indeed, addition of PMD antagonized the bactericidal  
98 activity of BDQ, BDQ+PZA and BDQ+PZA+clofazimine (CFZ) in past experiments in  
99 mice (11-13). However, the addition of PMD increased the bactericidal activity when  
100 added to BDQ+LZD and increased both the bactericidal and sterilizing activity when  
101 added to BDQ+sutezolid (6, 12). Another possible advantage of including PMD in the  
102 BPamZ regimen is that it could reduce the selection of BDQ-resistant mutants, since such  
103 mutants would be more effectively targeted by PaMZ (PMD + MXF + PZA) than by MZ  
104 (MXF + PZA) alone (since PaMZ is a synergistic combination (14)), when considering  
105 the reliably active drugs remaining in the regimen.

106 The present study was undertaken to confirm the independent contributions of PMD  
107 to BPamZ and BPaL by assessing the efficacy of each regimen with and without  
108 inclusion of PMD. Both regimens were evaluated in the same high-dose aerosol infection  
109 model in BALB/c mice in which their therapeutic potential was first described (4, 6). The

110 contribution of PMD to the 4-drug BPamZ regimen was further evaluated in athymic  
111 nude mouse and C3HeB/FeJ mouse models of TB. Athymic nude mice, which lack  
112 mature, differentiated T cells and are thus deprived of cell-mediated immunity, are more  
113 prone to relapse and the emergence of drug-resistant mutants than BALB/c mice (15, 16),  
114 thereby providing a more stringent model for evaluating a regimen's ability to truly  
115 sterilize the infection and/or prevent the selection of drug-resistant mutants. This model  
116 may be more representative of TB in patients with immunocompromising diseases such  
117 as human immunodeficiency virus (HIV) or following iatrogenic immunosuppression  
118 who have an increased risk of treatment failure and relapse, especially those not receiving  
119 antiretroviral therapy (17).

120 C3HeB/FeJ mice are increasingly being utilized for TB drug development because,  
121 unlike BALB/c mice which develop only cellular granulomas following infection with *M.*  
122 *tuberculosis*, the former develop caseating necrotic lung lesions, including cavities, that  
123 more closely resemble the pathological hallmarks of human TB (18-21). The necrotic  
124 nature of these lesions can alter drug partitioning and present different  
125 microenvironments at the site of infection in various lesion sub-compartments that affect  
126 the overall efficacy of some drugs (18, 19, 22-24). Therefore, comparative studies are  
127 useful to evaluate the potential impact of these pathological differences on drug efficacy.

128

## 129 **Results**

130 **Experiment 1. Comparison of BPamZ and BMZ in BALB/c and athymic nude**  
131 **mice.** The scheme of this experiment is shown in Table S1. The aerosol infection  
132 implanted nearly 4 log<sub>10</sub> CFU in the lungs of both mouse strains (Table 1). At the start of  
133 the treatment 14 days post-infection, BALB/c mice and nude mice harbored  
134 approximately 7.95 and 7.56 log<sub>10</sub> CFU in their lungs, respectively. After 1 month of  
135 treatment, the addition of PMD to BMZ resulted in an additional reduction of  
136 approximately 1 log<sub>10</sub> in both BALB/c and nude mice ( $P < 0.01$ ). Irrespective of the

137 regimen, the decrease in lung CFU counts was significantly greater in BALB/c mice  
138 compared to nude mice, with additional 1.1 log<sub>10</sub> reductions observed with both regimens  
139 ( $P < 0.01$ ). Based on prior experience (4), BALB/c mice were expected to be  
140 culture-negative after 2 months of treatment and were not assessed at that time point.  
141 Among nude mice, all mice in the BPamZ group and 7 of 10 mice in the BMZ group  
142 were culture-negative at 2 months despite plating the entire lung homogenate. Only a few  
143 CFU were detected in the other 3 mice of the BMZ group.

144 Relapse was assessed 3 months after completing 1.5 and 2 months of treatment in  
145 BALB/c mice and after 2.5 months of treatment in nude mice (Table 1). In BALB/c mice,  
146 no significant difference was observed in the proportions of mice relapsing after  
147 treatment with BPamZ (3/15 [20%]) or BMZ (2/15 [13%]) for 1.5 months ( $P = 1.0$ ).  
148 Both groups were relapse-free after 2 months of treatment. Among nude mice, which  
149 required a longer duration of treatment to cure, the proportion relapsing after 2.5 months  
150 of treatment was higher in BMZ-treated mice (4/16 [25%]) compared to BPamZ-treated  
151 mice (1/18 [6%]), but the difference was not statistically significant ( $P = 0.16$ ). Three  
152 nude mice in the BMZ group were euthanized when they became moribund just 6 weeks  
153 after completing treatment. Colonies isolated from lung homogenates were confirmed to  
154 be *M. tuberculosis* by colony morphology, acid-fast staining and 16s rRNA sequencing.  
155 Therefore, these mice were counted as relapses. Three nude mice in the BPamZ group  
156 also required euthanasia when they became moribund 9 weeks after completing treatment.  
157 However, the lung homogenates from these 3 mice yielded no growth except 1 colony  
158 from the lungs of one mouse that was subsequently identified by colony morphotype,  
159 AFB staining, and 16s rRNA sequencing as *Staphylococcus epidermidis*. Therefore, these  
160 mice were not counted as relapses.

161 We hypothesized that the addition of PMD to BMZ would reduce the selection of  
162 BDQ-resistant mutants in nude mice. At the start of treatment, lung homogenates from 5  
163 mice were plated in parallel on media containing 0.06 µg/ml of BDQ or 2 µg/ml of PMD.

164 The mean frequencies of CFU isolated on BDQ- and PMD-containing plates were  $1.3 \times$   
165  $10^{-6}$  and  $6.1 \times 10^{-6}$ , respectively, among the total CFU counted on drug-free plates. Three  
166 to five individual BDQ-resistant colonies were selected from each mouse for sequencing  
167 of the *Rv0678*, *pepQ*, and *atpE* genes. Spontaneous *Rv0678* mutants were identified in all  
168 5 mice and unique *pepQ* mutants were also found in 2 of the 5 mice (Table S2). None of  
169 the 7 colonies tested had *atpE* mutations. In total, 15 unique mutations (most of them  
170 frameshift mutations) were scattered across the *Rv0678* gene. Two mutants isolated on  
171 BDQ-containing plates (colonies 8 and 16) were selected for whole genome sequencing  
172 (WGS) to confirm the mutations. WGS confirmed the *Rv0678* mutations previously  
173 identified by PCR-based sequencing and the absence of other mutations. Among  
174 relapsing mice, a single colony grew on BDQ-containing plates from one of 3 nude mice  
175 relapsing 6 weeks after completing 10 weeks of BMZ treatment. It harbored a c313t  
176 (R105C) mutation in *rv0678*. However, this mutant represented a very small proportion  
177 of the total CFU count similar to the baseline frequency at D0, suggesting that it reflected  
178 a spontaneous mutation arising during multiplication after treatment ended. Growth  
179 amounting to more than 1% of the total CFU count was observed on BDQ-containing  
180 plates from one mouse relapsing at 12 weeks post-treatment with BMZ and sequencing  
181 revealed a *pepQ* mutation (g896t), indicating that this mutant was likely selectively  
182 amplified during treatment. Among all the BDQ-resistant mutants, frameshift mutations  
183 in *Rv0678* were routinely associated with 2-fold-higher MICs than single nucleotide  
184 polymorphisms (SNPs) in *Rv0678* and *pepQ* (Table 2).

185 **Experiment 2. Confirmation of the contribution of PMD to the BPamZ and BPAL**  
186 **regimens in BALB/c mice and evaluation of the impact of baseline PZA- or**  
187 **PMD-resistance.** A second experiment was performed to confirm the results of  
188 Experiment 1, to evaluate the contribution of PMD to BPamZ in the event of baseline  
189 PZA resistance, to assess the contribution of PMD to the sterilizing activity of BPAL, and  
190 to confirm that the contribution of PMD to BPamZ and BPAL is directly attributable to its

191 anti-tuberculosis activity upon activation by Ddn. The schemes for this experiment are  
192 shown in Tables S3 and S4. Mice were infected in parallel with the H37Rv strain or either  
193 of the isogenic PZA- or PMD-resistant mutants. Mean lung CFU counts exceeded  $4 \log_{10}$   
194 CFU on the day after infection (Table 2). At the start of the treatment 2 weeks later, mean  
195 CFU counts were approximately  $8 \log_{10}$  CFU in the H37Rv and *pncA* mutant infection  
196 groups, respectively, and modestly lower in the *ddn* mutant group. Among mice infected  
197 with the H37Rv parent, the addition of PMD to BMZ did not result in a statistically  
198 significant decrease in lung CFU counts after 1 month of treatment. However, the  
199 addition of PMD was associated with lower CFU counts at the relapse assessments after 1  
200 ( $P = 0.001$ ) and 1.5 months of treatment ( $P = 0.02$ ), as well as fewer relapses after 1.5  
201 months of treatment ( $P = 0.02$ ) (Figure 1, Table 2). The isolate from the mouse that  
202 relapsed after 2 months of BMZ treatment was not BDQ-resistant.

203 As expected, both regimens were significantly less effective against the *pncA* mutant,  
204 consistent with the important contribution of PZA previously observed in wild-type  
205 infections (4). No significant effect of PMD was observed in the mean CFU counts after  
206 1 or 2 months of treatment (Table 2). However, addition of PMD was associated with  
207 significantly fewer relapses ( $P = 0.01$ ) (Table 2) and lower CFU counts at the relapse  
208 assessment ( $P = 0.01$ ) after 3 months of treatment (Figure 2). Addition of PMD also  
209 prevented the selection of BDQ-resistant mutants in *pncA* mutant-infected mice. Seven  
210 mice receiving BMZ (3 and 4 mice treated for 2 and 3 months, respectively) had growth  
211 on plates containing BDQ  $0.125 \mu\text{g/ml}$  plates that exceeded 1% of the growth on  
212 drug-free plates (range, 15-100%), compared to just one mouse receiving BPamZ for 2  
213 months ( $P = 0.05$ ). Six of the 7 isolates tested from BDQ-containing plates had mutations  
214 in *Rv0678* (5) or *pepQ* (1) (Table 3). After 2 months of treatment in *pncA* mutant-infected  
215 mice, 3/15 relapses in the BMZ group had BDQ-resistant CFU with unique mutations of  
216 *g362a* and an *a436* insertion in *Rv0678* and a *g812* insertion in *pepQ* vs. 1/15 in the  
217 BPamZ group with an *a202g* mutation in *Rv0678*. After 3 months of treatment, 3 relapses



218 in the BMZ group were BDQ-resistant CFU with t407c substitution or a g168 deletion in  
219 *Rv0678* in 2 isolates and wild-type *Rv0678* and *pepQ* sequences.

220 Among mice infected with the H37Rv parent, addition of PMD to BL was associated  
221 with significantly lower mean CFU counts after 1 ( $P < 0.0001$ ) and 2 ( $P = 0.0006$ )  
222 months of treatment (Table 2). Addition of PMD also had a marked effect on sterilizing  
223 activity. For example, the proportion of mice relapsing after treatment with BPaL for just  
224 2 months (7/15 [47%]) was lower than that observed in mice receiving BL for 4 months  
225 (14/15 [93%]) ( $P = 0.01$ ), indicating that inclusion of PMD reduced the treatment  
226 duration necessary to prevent relapse by at least 2 months. Addition of PMD also  
227 prevented the selection of BDQ-resistant mutants. Seven, five and five mice relapsing  
228 after receiving BL for 2, 3 and 4 months, respectively, had CFU growing on  
229 BDQ-containing plates exceeding 1% of the total CFU count and an additional mouse in  
230 the 2-month treatment cohort barely missed this threshold. The actual proportions of CFU  
231 growing on BDQ increased with treatment duration (1-5%, 2-22% and 2-41% after 2, 3  
232 and 4 months of treatment, respectively). In contrast, no growth was observed on  
233 BDQ-containing plates in any mouse relapsing after BPaL treatment ( $P < 0.0001$ ). Four  
234 of the 5 isolates from BDQ-containing plates at the M3+3 time point were tested and had  
235 mutations detected in *Rv0678* (3 isolates with g73t, t128c, or g457c substitutions) or  
236 *pepQ* (1 isolate with t68c substitution), while the remaining isolate had wild-type  
237 sequences in these genes (Table 3). All 5 mice relapsing at M4+3 harbored *Rv0678*  
238 mutants with single g320t, g73t, g457c, or c286t substitutions or both g74a and g197a  
239 substitutions in 2 isolates from one mouse (Table 3).

240 As expected, infection with the PMD-resistant *ddn* mutant eliminated the  
241 contribution of PMD to both the BPaMZ and BPaL regimens (Table 4). In fact, a trend  
242 towards modest dose-dependent antagonism was observed in mean CFU count  
243 comparisons when adding PMD to these combinations.

244 **Experiment 3. Comparison of BPaMZ and BMZ in C3HeB/FeJ mice.** The scheme for

245 this experiment is shown in Table S5. The two aerosol infections each implanted  
246 approximately  $3 \log_{10}$  CFU in the lungs of C3HeB/FeJ mice. By the start of treatment 4  
247 weeks after the first infection, the mean CFU count had increased to  $9.43 \pm 0.33 \log_{10}$ . Due  
248 to the unexpectedly high burden of infection and the rapidly evolving lung damage  
249 underway at treatment onset, substantial mortality was observed over the ensuing  
250 2-month treatment period despite the strong bactericidal effect of both regimens. Addition  
251 of PMD to the BMZ regimen extended the median survival from 21 days to more than 60  
252 days ( $P < 0.0001$ ) (Figure 3) and significantly increased the bactericidal activity. After 1  
253 month of treatment, the median lung CFU count was  $2.4 \log_{10}$  lower among mice  
254 receiving BPamZ compared to BMZ ( $P < 0.01$ ) (Figure 4). After 2 months of treatment,  
255 only 2 BMZ-treated mice survived compared to 10 BPamZ-treated mice. Other than 1  
256 BPamZ-treated mouse with 2 CFU, all mice were culture-negative. No colonies were  
257 isolated on plates containing BDQ ( $0.06 \mu\text{g/ml}$ ) or PMD ( $2 \mu\text{g/ml}$ ) at either time point.

258 At 4 weeks post-infection (D0) with a high aerosol dose of *M. tuberculosis* HN878  
259 under an accelerated disease protocol, C3HeB/FeJ mice exhibited extensive lung  
260 involvement with both cellular and caseating lesions (Figure 5). Cellular lesions were  
261 composed of neutrophilic clusters interspersed with lymphocytes and epithelioid  
262 macrophages. Caseating lesions included both isolated and coalescing granulomas with  
263 varying degrees of central caseation and cellularity (Figure 5, D0). Dense neutrophilic  
264 infiltration and abundant intracellular and extracellular acid-fast bacilli were evident at  
265 the foamy macrophage:caseum interface. By 6 weeks post-infection (W2 of treatment),  
266 the extent of lung disease had increased despite treatment. While some caseating lesions  
267 displayed more organized structures with an increasingly well-defined fibrous rim, more  
268 extensive central caseation and even cavitation, other areas displayed extensive  
269 infiltration with exudative pneumonitis (Figure 5 W2). Extracellular bacteria were  
270 increasingly evident in the acellular caseum. At 8 weeks post-infection (M1 of treatment),  
271 lung volumes were dominated by large areas of necrosis with central caseation and

272 cavitory lesions (Figure 5 M1). Multiple lesion types presented at this time, suggesting  
273 heterogeneous disease progression. After 1 month of treatment with BPamZ or BMZ,  
274 acid-fast staining was more diffuse and reflective of structural deterioration of bacteria by  
275 the highly bactericidal regimens. After 2 months of treatment, similar pathological  
276 changes were evident on H&E staining (Figure 5 M2), but no visible intact acid-fast  
277 bacilli were observed in either treatment group.

## 278 **Discussion**

279 The BPaL and BPamZ regimens have the potential to transform the treatment of  
280 both drug-susceptible and drug-resistant TB. The former shows promise as an oral  
281 short-course (e.g., 6-month) regimen for multidrug- and extensively drug-resistant TB (7),  
282 while the latter may be capable of shortening the treatment of drug-susceptible TB to 4  
283 months or less and could reasonably be expected to do the same for multidrug-resistant  
284 TB with preserved susceptibility to MXF and PZA(5). Both regimens were identified in a  
285 comprehensive screening program seeking to identify broad-spectrum regimens  
286 containing two or more novel agents with minimal pre-existing resistance in our  
287 high-dose aerosol infection model in BALB/c mice (4, 6). However, while the  
288 independent contributions of each other component of these regimens has been confirmed  
289 in this model (4, 6), the contribution of the investigational new drug PMD to the BPamZ  
290 regimen was not previously demonstrated and its contribution to the BPaL regimen was  
291 only assessed as far as the bactericidal activity of the regimen over the first 2 months of  
292 treatment and not PMD's contribution to the regimen's sterilizing activity.

293 The present study assessed the contribution of PMD to the BPamZ regimen in 3  
294 different murine models of TB and its contribution to the sterilizing activity of BPaL in  
295 BALB/c mice. Studies using the relapse endpoint in BALB/c mice have demonstrated  
296 utility for regimen selection and estimation of treatment duration (25, 26). The present  
297 results reinforce our prior findings that BPamZ has remarkable bactericidal and  
298 sterilizing activity in BALB/c mice (4) and extend them by demonstrating the

299 independent contribution of PMD, as demonstrated by the BPamZ regimen's superior  
300 reduction of M1 lung CFU counts compared to BMZ in Experiment 1 and its superior  
301 prevention of relapse in Experiment 2. The present study also confirmed the contribution  
302 of PMD to the bactericidal activity of the BPamL regimen observed in prior studies (6, 12)  
303 and shows, for the first time, PMD's key contribution to the sterilizing activity of this  
304 regimen.

305 Prior work has established immunocompromised athymic nude mice as a more  
306 stringent model for measuring the sterilizing activity of rifamycin-based regimens, as  
307 well as such regimens' ability to restrict the emergence of resistance, indicating a  
308 beneficial contribution of cell-mediated immunity in the treatment response (15, 16).  
309 Therefore, it was expected that the eradication of cultivable bacteria with BPamZ would  
310 require a longer duration of treatment in this strain. Nevertheless, BPamZ rendered nude  
311 mice culture-negative with  $\leq 2$  months of treatment and prevented relapse in nearly 95%  
312 of mice after 2.5 months of treatment. The absence of relapse in nude mice is likely to  
313 reflect true sterilization of infection by the regimen, especially considering the rapid  
314 demise of 3 of 4 relapsing mice in the BMZ arm, and affirms the intrinsic sterilizing  
315 activity of this drug combination. It should be noted that the bactericidal and sterilizing  
316 activity of BPamZ in this experiment was superior to that of a rifapentine-isoniazid-PZA  
317 regimen previously evaluated in the same model (15). Inclusion of PMD significantly  
318 reduced lung CFU counts over the first month of treatment and reduced the proportion of  
319 mice relapsing, although the effect of PMD on relapse did not reach statistical  
320 significance. These results suggest that PMD's contribution to the regimen will extend to  
321 immunocompromised hosts.

322 To further examine the contribution of PMD to BPamZ, we used the emerging  
323 C3HeB/FeJ mouse model to better mimic the pathophysiological conditions found within  
324 caseating human lung lesions (e.g., hypoxia, more neutral pH) (18-20, 22, 24, 27). Prior  
325 observations have indicated reduced diffusion of BDQ into the caseous regions of

326 necrotic lung lesions relative to the bordering cellular regions and reduced activity of  
327 PZA in caseum with near-neutral pH in this strain (23, 24). On the other hand, PMD  
328 appears to diffuse well through caseum and is active under hypoxic conditions (10, 28),  
329 so should lend important bactericidal activity in caseous lesions. The high infectious dose  
330 and repeated aerosol infection protocol used in Experiment 3 resulted in extensive lung  
331 involvement with large, often coalescing, caseating granulomas, caseous pneumonia and,  
332 over time, cavitation. The massive bacterial burden and marked severity of lung disease  
333 present at the onset of treatment resulted in further pathologic progression and death  
334 despite the initiation of the highly bactericidal BPamZ and BMZ regimens. Despite this  
335 “worst case scenario”, the inclusion of PMD in the regimen significantly increased the  
336 median survival time and the bactericidal activity, and the regimen rendered all mice  
337 culture-negative after 2 months of treatment, with the exception of a single mouse with 1  
338 detectable CFU. It is tempting to speculate that the larger effect of PMD on M1 CFU  
339 counts in this model compared to BALB/c and nude mice was a result of its superior  
340 distribution and/or activity within caseating lesions compared to BDQ and PZA. Further  
341 studies are warranted to assess PMD’s independent treatment-shortening effect in this  
342 model. Nevertheless, these studies provide further reassurance that the results observed  
343 with BPamZ, and the contribution of PMD specifically, are translatable to human TB.

344 BDQ is a key bactericidal and sterilizing component of the BPamZ and BPamL  
345 regimens (4, 6). As such, it exerts strong selection pressure and bactericidal and  
346 sterilizing companion drugs are necessary to restrict the selective amplification of  
347 spontaneous BDQ-resistant mutants. Previous studies have identified BDQ-resistant  
348 mutants selected *in vitro*, in mice and in TB patients (13, 29-31). In most cases in which it  
349 emerged *in vivo*, resistance was attributable to mutations in the transcriptional repressor  
350 *Rv0678* or in the predicted proline aminopeptidase *pepQ*, although the latter mutation  
351 target has yet to be confirmed in BDQ-resistant clinical isolates. In the present study, we  
352 tracked the selection of BDQ-resistant mutants, and the ability of PMD to prevent such

353 selection, in immunocompromised nude mice in Experiment 1, BALB/c mice in  
354 Experiment 2, and severely diseased C3HeB/FeJ mice in Experiment 3. Fortunately, the  
355 BPamZ regimen proved to be quite robust to the emergence of resistance in each model.  
356 The only instance in which a BDQ-resistant isolate was observed after BPamZ treatment  
357 was a single mouse in Experiment 2 that was originally infected with a PZA-resistant  
358 strain, compared to 6 mice receiving BMZ against the same strain. Likewise, inclusion of  
359 PMD in the BPamL regimen significantly reduced the proportion of relapsing mice with  
360 BDQ resistance. These findings demonstrate the limited ability of LZD and MXF,  
361 respectively, to prevent the selective amplification of BDQ resistance on their own and  
362 suggest that PZA may play an important role in preventing such amplification among  
363 phenotypic sub-populations similar to those represented in BALB/c mice.

364 Interestingly, no selection of BDQ resistance was observed with BPamZ or BMZ  
365 treatment of C3HeB/FeJ mice despite the large bacterial burden and the expected limited  
366 contribution of PZA in caseous lesions in this model (24). Here, PMD and MXF may be  
367 especially effective in the caseum compartment while PZA again works in the  
368 intracellular compartment. Similarly, little BDQ resistance selection was observed in  
369 nude mice, and only in a BMZ-treated mouse, despite evidence of spontaneous resistant  
370 mutants present at baseline, when all nude mice sampled harbored *Rv0678* mutant  
371 sub-populations and 2 of 5 harbored spontaneous *pepQ* mutants (40%). Consistent with  
372 some prior observations (30, 32), frameshift mutations in *Rv0678* caused higher MICs  
373 than single nucleotide polymorphisms in *Rv0678* and *pepQ* mutations. It is noteworthy  
374 that the MICs associated with the latter mutants, in particular, hover around the recently  
375 proposed critical concentration for BDQ susceptibility testing on 7H11 agar (33) and  
376 hence may not be recognized as resistant despite their apparent reduced BDQ  
377 susceptibility and propensity for selective amplification despite combination therapy in  
378 mice.

379 In conclusion, PMD contributed significantly to the efficacy of both the BPamZ and

380 BPaL regimens and reduced the selection of bedaquiline-resistant mutants. These results  
381 support further clinical trials to confirm the therapeutic utility of each of these  
382 PMD-containing regimens.

## 383 **Methods**

384 **Bacterial strains.** *M. tuberculosis* H37Rv was mouse-passaged, frozen in aliquots, and  
385 subcultured in Middlebrook 7H9 broth supplemented with 10% oleic  
386 acid-albumin-dextrose-catalase (OADC) (Fisher, Pittsburgh, PA) and 0.05% Tween 80  
387 prior to infection. An isogenic PZA-resistant mutant was selected from a mouse infected  
388 with the H37Rv strain and treated with PZA monotherapy and an isolated mutation in  
389 *pncA* (A146V) was confirmed by whole genome sequencing (24). The PZA MIC for this  
390 *pncA* mutant is  $\geq 900$   $\mu\text{g/ml}$  (vs. 150  $\mu\text{g/ml}$  for the parent H37Rv strain) by 7H9 broth  
391 dilution at pH 6.8. An isogenic PMD-resistant mutant was selected from a mouse infected  
392 with the H37Rv strain and treated with PMD monotherapy and an isolated mutation in  
393 *ddn* (M1T) was confirmed by whole genome sequencing. The pretomanid MIC for this  
394 *ddn* mutant is  $\geq 16$   $\mu\text{g/ml}$  (vs. 0.06-0.125  $\mu\text{g/ml}$  for the parent H37Rv strain) by 7H9  
395 broth dilution. *M. tuberculosis* HN878 was used as frozen stocks prepared from a  
396 log-phase culture in Middlebrook 7H9 broth after mouse passage and was diluted in  
397 phosphate buffered saline (PBS) before infection.

398 **Aerosol infection with *M. tuberculosis*.** All animal procedures were approved by the  
399 Animal Care and Use Committee of Johns Hopkins University. Six-week-old female  
400 BALB/c mice and immunodeficient athymic CD-1 nude mice (Charles River  
401 Laboratories, Wilmington, MA) were infected with *M. tuberculosis* H37Rv or the  
402 isogenic *pncA* or *ddn* mutant, using the Inhalation Exposure System (Glas-Col, Terre  
403 Haute, IN) and a fresh log-phase broth culture (optical density at 600 nm, 0.8 to 1.0),  
404 with the goal of implanting 4  $\log_{10}$  CFU in the lungs of each mouse (4). Four or five mice  
405 were humanely killed 1 day after infection (D-13) and on the day of treatment initiation  
406 (D0) to determine the number of bacteria implanted in the lungs and at the start of

407 treatment, respectively.

408 Female C3HeB/FeJ mice (Jackson Labs, Bar Harbor, ME), 10 weeks old, were  
409 aerosol-infected with *M. tuberculosis* HN878 on two occasions spaced 10 days apart  
410 (with mice divided into 2 runs per occasion) in a repeated infection protocol intended to  
411 promote more advanced caseating lung lesions. On each occasion, a frozen stock culture  
412 was thawed and diluted with the intention to implant approximately 200 CFU per run.  
413 Treatment started at 4 weeks after the first infection. Six and nine mice (2 or 3 mice per  
414 run) were sacrificed for lung CFU counts on W-4 and D0 to determine the number of  
415 CFU implanted and the number present at the start of treatment, respectively.

416 **Chemotherapy.** Drugs were prepared as previously described and administered once  
417 daily, 5 days per week, by gavage (11). The drug doses (in mg/kg) were as follows: BDQ,  
418 25; PMD, 100; MXF, 100; PZA, 150; LZD, 100 (4, 6). BDQ and PMD were prepared  
419 separately and administered together after mixing just prior to administration. MXF,  
420 MXF+PZA or LZD were administered at least 4 hours later.

421 **Assessment of treatment efficacy.** Efficacy was assessed on the basis of lung CFU  
422 counts at selected time points during treatment (a measure of bactericidal activity) and  
423 the proportion of mice with culture-positive relapse after treatment completion (a  
424 measure of sterilizing activity). Lung homogenates were plated in serial 10-fold dilutions  
425 onto selective 7H11 agar plates supplemented with 0.4% activated charcoal to reduce  
426 carryover effects (11) and incubated for 6 weeks before determining final CFU counts.

427 **Evaluation of resistance selection.** Aliquots representing one-fifth of the lung  
428 homogenates were plated directly onto selective 7H11 agar containing 0.06 or 0.125  
429  $\mu\text{g/ml}$  of BDQ or 2  $\mu\text{g/ml}$  of PMD to quantify the proportion of CFU resistant to either  
430 drug at selected time points before, during and after treatment. Colonies isolated on  
431 BDQ-containing plates were selected and analyzed by PCR and DNA sequencing of the  
432 *rv0678*, *pepQ*, and *atpE* genes, as described previously (13). The MICs of  
433 bedaquiline-resistant isolates and H37Rv were determined using the broth macrodilution



434 method with doubling concentrations of bedaquiline from 0.03 to 2 µg/ml (13). Briefly,  
435 tubes containing 2.5 ml of 7H9 broth plus OADC without Tween 80 with the  
436 above-mentioned concentrations of bedaquiline were inoculated with 10<sup>5</sup> CFU of  
437 log-phase culture of H37Rv or BDQ-resistant isolates. The MIC was defined as the  
438 lowest concentration that prevented visible growth after 14 days of incubation at 37°C.

439 **16S ribosomal RNA sequencing for identification of bacteria.** Genomic DNA was  
440 extracted from bacterial colonies using the cetyltrimethylammonium bromide (CTAB)  
441 method. 16S rRNA was amplified with primers 16S-F  
442 (5'-AGAGTTTGATCCTGGCTCAG-3') and 16S-R (5'-ACGGGCGGTGTCTACAA-3')  
443 targeting positions 11–1399 of the 16S rRNA gene (34). PCR products were purified with  
444 QIAquick PCR purification kits (QIAGEN, Germany), mixed with primers, then  
445 sequenced (GeneWiz Inc.). Species identification was performed using BLAST search  
446 (GenBank database sequences) with sequence data.

447 **Statistical analysis.** Lung CFU counts (x) were log-transformed (as x+1) before analysis,  
448 and mean and median CFU counts were compared using Student's t test and  
449 Kruskal-Wallis tests, respectively. The proportions of mice relapsing were compared  
450 using Fisher's Exact test. Survival analyses were performed using the Kaplan-Meier  
451 method (20), and the log rank test was used to compare the observed differences in  
452 survival. All analyses were performed with GraphPad Prism version 5 (GraphPad, San  
453 Diego, CA).

454

## 455 **Acknowledgements**

456 This research was supported by TB Alliance with support from Australia Aid, the Bill and  
457 Melinda Gates Foundation, the Germany Federal Ministry of Education and Research  
458 through KfW, Global Health Innovative Technology Fund, Irish Aid, Netherlands  
459 Ministry of Foreign Affairs, UK Aid and the UK Department of Health; and the National  
460 Institutes of Health (R01-AI11992 to E.N.).

461

Table 1. Lung CFU counts assessed during treatment and proportion of mice relapsing after treatment completion in Experiment 1

| Mouse strain | Drug regimen <sup>a</sup> | Mean ( $\pm$ SD) log <sub>10</sub> CFU count at <sup>b</sup> : |                 |                 |                 | Proportion (%) relapsing after treatment for: |          |           |
|--------------|---------------------------|----------------------------------------------------------------|-----------------|-----------------|-----------------|-----------------------------------------------|----------|-----------|
|              |                           | D-13                                                           | D0              | M1              | M2              | 1.5 mo.                                       | 2 mo.    | 2.5 mo.   |
| BALB/c       | Untreated                 | 3.98 $\pm$ 0.09                                                | 7.95 $\pm$ 0.25 |                 |                 |                                               |          |           |
|              | BPamZ                     |                                                                |                 | 0.53 $\pm$ 0.44 |                 | 3/15 (20)                                     | 0/16 (0) |           |
|              | BMZ                       |                                                                |                 | 1.48 $\pm$ 0.28 |                 | 2/15 (13)                                     | 0/15 (0) |           |
| Nude         | Untreated                 | 3.97 $\pm$ 0.09                                                | 7.56 $\pm$ 0.17 |                 |                 |                                               |          |           |
|              | BPamZ                     |                                                                |                 | 1.63 $\pm$ 0.49 | 0.00 $\pm$ 0.00 |                                               |          | 1/18 (6)  |
|              | BMZ                       |                                                                |                 | 2.62 $\pm$ 0.42 | 0.31 $\pm$ 0.61 |                                               |          | 4/16 (25) |

462 <sup>a</sup>Drug regimen abbreviations are as follows: BPamZ, bedaquiline + pretomanid +  
 463 moxifloxacin + pyrazinamide; BMZ, bedaquiline + moxifloxacin + pyrazinamide.

464 <sup>b</sup>Time points are shown as days (D-13 or D0) or months (M1 or M2) of treatment. 1.5 mo.  
 465 indicates that the mice were held for 3 additional months after completing 1.5 months of  
 466 treatment.

467

468 Table 2. Lung CFU counts assessed during treatment against *M. tuberculosis* H37Rv  
 469 (wild-type) and a *pncA* mutant (in italics) and proportion of mice relapsing after treatment  
 470 completion in Experiment 2

| Regimen <sup>a</sup> | Mean lung log <sub>10</sub> CFU count (±SD) <sup>b</sup> |           |           |           | Proportion of mice relapsing after treatment for <sup>c</sup> : |         |                    |                    |                    |
|----------------------|----------------------------------------------------------|-----------|-----------|-----------|-----------------------------------------------------------------|---------|--------------------|--------------------|--------------------|
|                      | D-14                                                     | D0        | M1        | M2        | 1 mo.                                                           | 1.5 mo. | 2 mo.              | 3 mo.              | 4 mo.              |
| Untreated            | 4.06±0.05                                                | 7.90±0.16 |           |           |                                                                 |         |                    |                    |                    |
| BL                   |                                                          |           | 4.87±0.16 | 2.69±0.30 |                                                                 |         | 15/15 <sup>7</sup> | 15/15 <sup>5</sup> | 14/15 <sup>5</sup> |
| BPaL                 |                                                          |           | 3.29±0.09 | 0.68±0.24 |                                                                 |         | 7/15               | 0/15               | 0/15               |
| BMZ                  |                                                          |           | 1.29±0.19 |           | 15/15                                                           | 6/15    | 1/15               |                    |                    |
| BPaMZ                |                                                          |           | 1.05±0.18 |           | 14/15                                                           | 0/15    | 0/15               |                    |                    |
| <i>Untreated</i>     | 4.36±0.17                                                | 8.09±0.08 |           |           |                                                                 |         |                    |                    |                    |
| <i>BMZ</i>           |                                                          |           | 4.06±0.23 | 1.24±0.17 |                                                                 |         | 15/15 <sup>3</sup> | 7/20 <sup>3</sup>  |                    |
| <i>BPaMZ</i>         |                                                          |           | 4.22±0.23 | 1.61±0.32 |                                                                 |         | 15/15 <sup>1</sup> | 0/20               |                    |

471 <sup>a</sup>Drug regimen abbreviations are as follows: BL, bedaquiline + linezolid; BPaL,  
 472 bedaquiline + pretomanid + linezolid; BMZ, bedaquiline + moxifloxacin + pyrazinamide;  
 473 BPaMZ, bedaquiline + pretomanid + moxifloxacin + pyrazinamide.

474 <sup>b</sup>Time points are shown as days (D-14 or D0) or months (M1 or M2) of treatment. 1 mo.  
 475 indicates that the mice were held for 3 additional months after completing 1 month of  
 476 treatment.

477 <sup>c</sup>Superscripts represent the number of mice with isolates resistant to 0.125 mg/L BDQ.

478  
 479

480 Table 3. Mutations observed in *M. tuberculosis* colonies isolated from relapsing BALB/c  
481 mice on bedaquiline-containing plates in Experiment 2

| Time point | Strain background  | Mouse No. | <i>Rv0678</i> sequence <sup>a</sup>                        | <i>pepQ</i> sequence <sup>a</sup>                  |
|------------|--------------------|-----------|------------------------------------------------------------|----------------------------------------------------|
| M2(+3)     | <i>pncA</i> mutant | BMZ-1     | g362a (G120E) <sup>2/2</sup>                               | g812 insertion<br>(271 codon shift) <sup>2/2</sup> |
|            |                    | BMZ-11    | a436 insertion (146 codon shift) <sup>2/2</sup>            |                                                    |
|            |                    | BMZ-12    | WT <sup>2/2</sup>                                          |                                                    |
|            |                    | BPaMZ-15  | a202g (S68G) <sup>2/2</sup>                                |                                                    |
| M3(+3)     | <i>pncA</i> mutant | BMZ-1     | WT                                                         | WT                                                 |
|            |                    | BMZ-9     | g deletion @nt168 (56 codon shift) <sup>2/2</sup>          |                                                    |
|            |                    | BMZ-13    | t407c(L136P) <sup>2/2</sup>                                |                                                    |
|            | WT                 | BL-4      | g73t (G25C)                                                |                                                    |
|            |                    | BL-6      | WT                                                         | t68c (M23T)                                        |
|            |                    | BL-7      | WT                                                         | WT                                                 |
|            |                    | BL-11     | t128c (L43P)                                               |                                                    |
|            |                    | BL-14     | g457c (A153P)                                              | WT                                                 |
| M4(+3)     | WT                 | BL-6      | g320t (R107C) <sup>1/2</sup> ,<br>WT <sup>1/2</sup>        |                                                    |
|            |                    | BL-8      | g73t (G25C) <sup>2/2</sup>                                 |                                                    |
|            |                    | BL-9      | g457c (A153P) <sup>2/2</sup>                               |                                                    |
|            |                    | BL-12     | g74a (G25D) <sup>1/2</sup> ,<br>g197a(G66E) <sup>1/2</sup> |                                                    |
|            |                    | BL-14     | c286t(R96W) <sup>1/2</sup> ,<br>WT <sup>1/2</sup>          |                                                    |

482 <sup>a</sup>Superscripts indicate the proportion of colonies with the indicated genotype among the  
483 colonies tested.

484

485

486

487

488 Table 4. Lung CFU counts assessed during treatment against a *ddn* mutant and proportion  
 489 of mice relapsing after treatment completion in Experiment 2

| Regimen <sup>a</sup>  | Mean lung log <sub>10</sub> CFU count (±SD) <sup>b</sup> |           |           |              | Proportion of mice relapsing after treatment for |       |       |
|-----------------------|----------------------------------------------------------|-----------|-----------|--------------|--------------------------------------------------|-------|-------|
|                       | D-14                                                     | D0        | M1        | M2           | 1 mo.                                            | 2 mo. | 3 mo. |
| Untreated             | 4.23±0.07                                                | 7.61±0.19 |           |              |                                                  |       |       |
| Pa <sub>50</sub>      |                                                          |           | 7.34±0.12 | <sup>c</sup> |                                                  |       |       |
| Pa <sub>100</sub>     |                                                          |           | 7.26±0.07 | <sup>c</sup> |                                                  |       |       |
| BL                    |                                                          |           | 4.54±0.17 | 2.97±0.28    |                                                  |       | 15/15 |
| BPa <sub>50</sub> L   |                                                          |           | 4.68±0.41 | 3.05±0.28    |                                                  |       | 15/15 |
| BPa <sub>100</sub> L  |                                                          |           | 5.31±0.35 | 3.33±0.09    |                                                  |       | 15/15 |
| BMZ                   |                                                          |           | 2.36±0.63 | 0.00±0.00    | 15/15                                            | 2/15  |       |
| BPa <sub>50</sub> MZ  |                                                          |           | 2.49±0.24 | 0.08±0.19    | 15/15                                            | 1/15  |       |
| BPa <sub>100</sub> MZ |                                                          |           | 2.73±0.46 | 0.00±0.00    | 15/15                                            | 1/15  |       |

490 <sup>a</sup>Drug regimen abbreviations are as follows: BL, bedaquiline + linezolid; BPaL,  
 491 bedaquiline + pretomanid + linezolid; BMZ, bedaquiline + moxifloxacin + pyrazinamide;  
 492 BPaMZ, bedaquiline + pretomanid + moxifloxacin + pyrazinamide.

493 <sup>b</sup>Time points are shown as days (D-14 or D0) or months (M1 or M2) of treatment. 1 mo.  
 494 indicates that the mice were held for 3 additional months after completing 1 month of  
 495 treatment.

496 <sup>c</sup>Five mice receiving Pa monotherapy at either 50 or 100 mg/kg became ill, were  
 497 euthanized at Week 1, and had a mean lung CFU count of 9.07 log<sub>10</sub> CFU. One mouse in  
 498 the BL group also died at Week 1, due to a gavage accident. The lung contained 7.04  
 499 log<sub>10</sub> CFU.

500

501



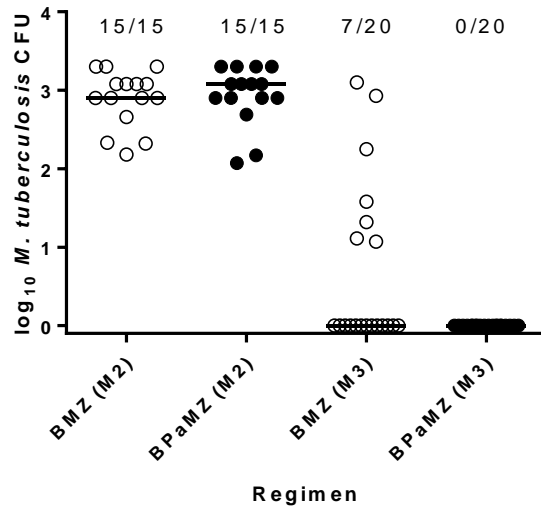

510

511 Figure 2. Proportion of relapses and individual mouse lung CFU counts (with median)  
512 after treatment of infection with *M. tuberculosis pncA* A146V mutant for two months  
513 (M2) and three months (M3) with each regimen. BMZ open black circles and BPaMZ  
514 solid black circles.

515

516

517

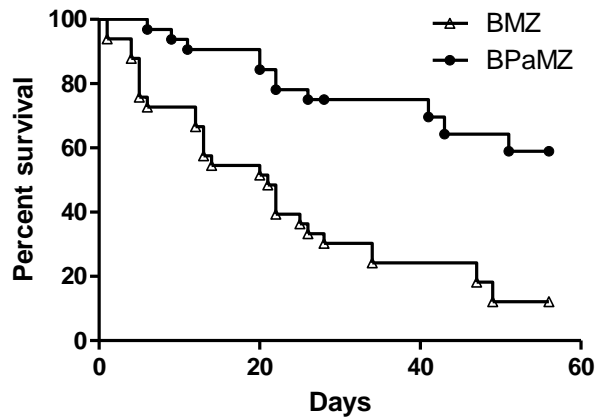

518

519 Figure 3. Survival of C3HeB/FeJ mice infected with *M. tuberculosis* HN878 from the

520 onset of treatment with BMZ or BPaMZ.

521

522

523

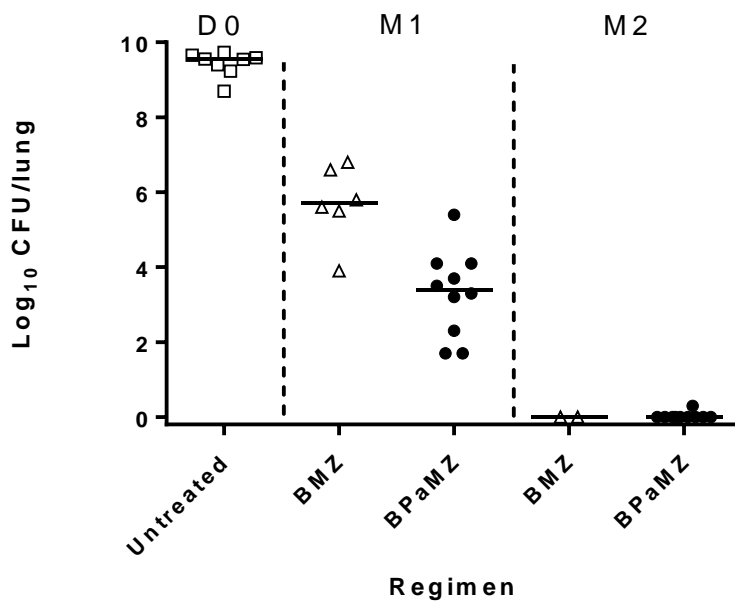

524

525 Figure 4. Lung CFU counts assessed during treatment in C3HeB/FeJ mice infected. Data

526 points indicate individual mouse CFU counts. Horizontal black line indicates the median.

527

528

529



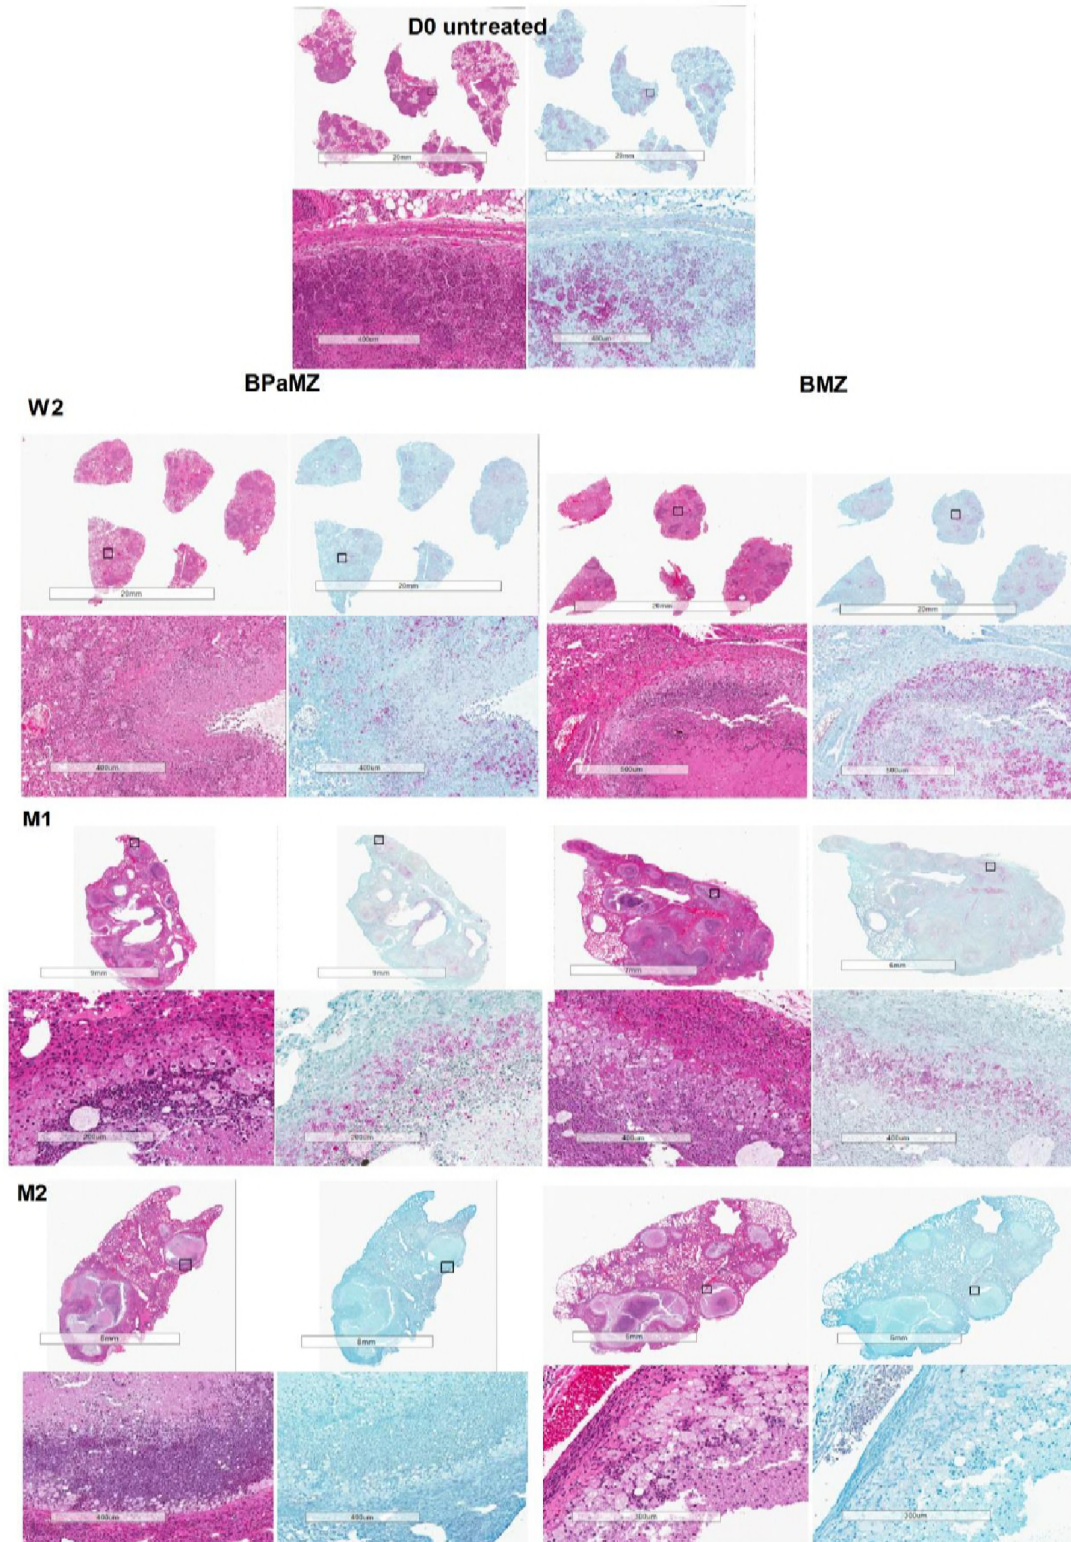

530

531 Figure 5. Lung histopathology in C3HeB/FeJ mice before and during treatment with

532 BPaMZ (left) or BMZ (right) beginning 4 weeks post-infection with *M. tuberculosis*

533 HN878. Hematoxylin and eosin (H&E) and Ziehl-Neelsen (AFB) staining was performed  
534 on lung tissue sections. Low-power views of an entire lung sectionsubmitted (upper) and  
535 higher-power views of individual granulomas or cavitary lesions (lower) from  
536 representative mice in each group are shown. D0, treatment initiation (4 weeks  
537 post-infection); W2, status post 2 weeks of treatment; M1, status post 1 month of  
538 treatment; M2, status post 2 months of treatment

539

540

541

542

543

544

545

546 **References**

547

- 548 1. **World Health Organization.** 2017. Global tuberculosis report 2017. Geneva,  
549 Switzerland [http://www.who.int/tb/publications/global\\_report/en/](http://www.who.int/tb/publications/global_report/en/).
- 550 2. **Tiberi S, du Plessis N, Walzl G, Vjecha MJ, Rao M, Ntouni F, Mfinanga S,**  
551 **Kapata N, Mwaba P, McHugh TD, Ippolito G, Migliori GB, Maeurer MJ,**  
552 **Zumla A.** 2018. Tuberculosis: progress and advances in development of new  
553 drugs, treatment regimens, and host-directed therapies. *Lancet Infect Dis*  
554 doi:10.1016/s1473-3099(18)30110-5.
- 555 3. **Van Deun A, Maug AK, Salim MA, Das PK, Sarker MR, Daru P, Rieder HL.**  
556 2010. Short, highly effective, and inexpensive standardized treatment of  
557 multidrug-resistant tuberculosis. *Am J Respir Crit Care Med* **182**:684-692.
- 558 4. **Li SY, Tasneen R, Tyagi S, Soni H, Converse PJ, Mdluli K, Nuermberger EL.**  
559 2017. Bactericidal and sterilizing activity of a novel regimen with bedaquiline,  
560 pretomanid, moxifloxacin and pyrazinamide in a murine model of tuberculosis.  
561 *Antimicrob Agents Chemother* doi:10.1128/aac.00913-17.
- 562 5. **Dawson R, Harris K, Conradie A, Burger D, Murray S, Mendel C,**  
563 **Spigelman M.** 2017. Efficacy of bedaquiline, pretomanid, moxifloxacin and PZA  
564 (BPAMZ) against DS- and MDR-TB. Abstract Number: 724LB, CROI, February  
565 13-16, 2017|Seattle, Washington
- 566 6. **Tasneen R, Betoudji F, Tyagi S, Li SY, Williams K, Converse PJ, Dartois V,**  
567 **Yang T, Mendel CM, Mdluli KE, Nuermberger EL.** 2015. Contribution of  
568 Oxazolidinones to the Efficacy of Novel Regimens Containing Bedaquiline and  
569 Pretomanid in a Mouse Model of Tuberculosis. *Antimicrob Agents Chemother*  
570 **60**:270-277.
- 571 7. **Conradie F, Diacon A, Everitt D, Mendel C, Crook A, Howell P, Comins K,**  
572 **Spigelman M.** 2018. Sustained high rate of successful treatment outcomes:  
573 interim results of 75 patients in the Nix-TB clinical study of pretomanid,

- 574           bedaquiline and linezolid. *Int J Tuberc Lung Dis* **22**:s1-s645.
- 575   8.   **Dawson R, Diacon AH, Everitt D, van Niekerk C, Donald PR, Burger DA,**  
576   **Schall R, Spigelman M, Conradie A, Eisenach K, Venter A, Ive P, Page-Shipp**  
577   **L, Variava E, Reither K, Ntinginya NE, Pym A, von Groote-Bidlingmaier F,**  
578   **Mendel CM.** 2015. Efficiency and safety of the combination of moxifloxacin,  
579   pretomanid (PA-824), and pyrazinamide during the first 8 weeks of  
580   antituberculosis treatment: a phase 2b, open-label, partly randomised trial in  
581   patients with drug-susceptible or drug-resistant pulmonary tuberculosis. *Lancet*  
582   **385**:1738-1747.
- 583   9.   **Stover CK, Warren P, VanDevanter DR, Sherman DR, Arain TM,**  
584   **Langhorne MH, Anderson SW, Towell JA, Yuan Y, McMurray DN,**  
585   **Kreiswirth BN, Barry CE, Baker WR.** 2000. A small-molecule  
586   nitroimidazopyran drug candidate for the treatment of tuberculosis. *Nature*  
587   **405**:962-966.
- 588   10. **Singh R, Manjunatha U, Boshoff HI, Ha YH, Niyomrattanakit P, Ledwidge R,**  
589   **Dowd CS, Lee IY, Kim P, Zhang L, Kang S, Keller TH, Jiricek J, Barry CE,**  
590   **3rd.** 2008. PA-824 kills nonreplicating *Mycobacterium tuberculosis* by  
591   intracellular NO release. *Science* **322**:1392-1395.
- 592   11. **Tasneen R, Li SY, Peloquin CA, Taylor D, Williams KN, Andries K, Mdluli**  
593   **KE, Nuermberger EL.** 2011. Sterilizing activity of novel TMC207- and  
594   PA-824-containing regimens in a murine model of tuberculosis. *Antimicrob*  
595   *Agents Chemother* **55**:5485-5492.
- 596   12. **Tasneen R, Williams K, Amoabeng O, Minkowski A, Mdluli KE, Upton AM,**  
597   **Nuermberger EL.** 2015. Contribution of the nitroimidazoles PA-824 and  
598   TBA-354 to the activity of novel regimens in murine models of tuberculosis.  
599   *Antimicrob Agents Chemother* **59**:129-135.
- 600   13. **Almeida D, Ioerger T, Tyagi S, Li S-Y, Mdluli K, Andries K, Grosset J,**

- 601        **Sacchetti J, Nuermberger E.** 2016. Mutations in pepQ Confer Low-level  
602        Resistance to Bedaquiline and Clofazimine in Mycobacterium tuberculosis.  
603        Antimicrobial agents and chemotherapy: AAC. 00753-00716.
- 604    14.    **Nuermberger E, Tyagi S, Tasneen R, Williams KN, Almeida D, Rosenthal I,**  
605        **Grosset JH.** 2008. Powerful bactericidal and sterilizing activity of a regimen  
606        containing PA-824, moxifloxacin, and pyrazinamide in a murine model of  
607        tuberculosis. Antimicrob Agents Chemother **52**:1522-1524.
- 608    15.    **Zhang M, Li SY, Rosenthal IM, Almeida DV, Ahmad Z, Converse PJ,**  
609        **Peloquin CA, Nuermberger EL, Grosset JH.** 2011. Treatment of tuberculosis  
610        with rifamycin-containing regimens in immune-deficient mice. Am J Respir Crit  
611        Care Med **183**:1254-1261.
- 612    16.    **Park SW, Tasneen R, Converse PJ, Nuermberger EL.** 2017.  
613        Immunodeficiency and Intermittent Dosing Promote Acquired Rifamycin  
614        Monoresistance in Murine Tuberculosis. Antimicrob Agents Chemother **61**.
- 615    17.    **Khan FA, Minion J, Pai M, Royce S, Burman W, Harries AD, Menzies D.**  
616        2010. Treatment of active tuberculosis in HIV-coinfected patients: a systematic  
617        review and meta-analysis. Clin Infect Dis **50**:1288-1299.
- 618    18.    **Irwin SM, Driver E, Lyon E, Schrupp C, Ryan G, Gonzalez-Juarrero M,**  
619        **Basaraba RJ, Nuermberger EL, Lenaerts AJ.** 2015. Presence of multiple lesion  
620        types with vastly different microenvironments in C3HeB/FeJ mice following  
621        aerosol infection with Mycobacterium tuberculosis. Dis Model Mech **8**:591-602.
- 622    19.    **Lanoix JP, Lenaerts AJ, Nuermberger EL.** 2015. Heterogeneous disease  
623        progression and treatment response in a C3HeB/FeJ mouse model of tuberculosis.  
624        Dis Model Mech **8**:603-610.
- 625    20.    **Ordonez AA, Tasneen R, Pokkali S, Xu Z, Converse PJ, Klunk MH, Mollura**  
626        **DJ, Nuermberger EL, Jain SK.** 2016. Mouse model of pulmonary cavitary  
627        tuberculosis and expression of matrix metalloproteinase-9. Dis Model Mech

- 628           **9:779-788.**
- 629   21.   **Hunter RL.** 2011. Pathology of post primary tuberculosis of the lung: an  
630           illustrated critical review. *Tuberculosis (Edinb)* **91:497-509.**
- 631   22.   **Irwin SM, Gruppo V, Brooks E, Gilliland J, Scherman M, Reichlen MJ,**  
632           **Leistikow R, Kramnik I, Nuermberger EL, Voskuil MI, Lenaerts AJ.** 2014.  
633           Limited activity of clofazimine as a single drug in a mouse model of tuberculosis  
634           exhibiting caseous necrotic granulomas. *Antimicrob Agents Chemother*  
635           **58:4026-4034.**
- 636   23.   **Irwin SM, Prideaux B, Lyon ER, Zimmerman MD, Brooks EJ, Schrupp CA,**  
637           **Chen C, Reichlen MJ, Asay BC, Voskuil MI, Nuermberger EL, Andries K,**  
638           **Lyons MA, Dartois V, Lenaerts AJ.** 2016. Bedaquiline and Pyrazinamide  
639           Treatment Responses Are Affected by Pulmonary Lesion Heterogeneity in  
640           Mycobacterium tuberculosis Infected C3HeB/FeJ Mice. *ACS Infect Dis*  
641           **2:251-267.**
- 642   24.   **Lanoix JP, Ioerger T, Ormond A, Kaya F, Sacchetti J, Dartois V,**  
643           **Nuermberger E.** 2016. Selective Inactivity of Pyrazinamide against Tuberculosis  
644           in C3HeB/FeJ Mice Is Best Explained by Neutral pH of Caseum. *Antimicrob*  
645           *Agents Chemother* **60:735-743.**
- 646   25.   **Nuermberger EL.** 2017. Preclinical Efficacy Testing of New Drug Candidates.  
647           *Microbiol Spectr* **5.**
- 648   26.   **Lanoix JP, Chaisson RE, Nuermberger EL.** 2016. Shortening Tuberculosis  
649           Treatment With Fluoroquinolones: Lost in Translation? *Clin Infect Dis*  
650           **62:484-490.**
- 651   27.   **Driver ER, Ryan GJ, Hoff DR, Irwin SM, Basaraba RJ, Kramnik I, Lenaerts**  
652           **AJ.** 2012. Evaluation of a mouse model of necrotic granuloma formation using  
653           C3HeB/FeJ mice for testing of drugs against Mycobacterium tuberculosis.  
654           *Antimicrob Agents Chemother* **56:3181-3195.**

- 655 28. **Dartois V.** 2014. The path of anti-tuberculosis drugs: from blood to lesions to  
656 mycobacterial cells. *Nat Rev Microbiol* **12**:159-167.
- 657 29. **Huitric E, Verhasselt P, Koul A, Andries K, Hoffner S, Andersson DI.** 2010.  
658 Rates and mechanisms of resistance development in *Mycobacterium tuberculosis*  
659 to a novel diarylquinoline ATP synthase inhibitor. *Antimicrob Agents Chemother*  
660 **54**:1022-1028.
- 661 30. **Andries K, Villellas C, Coeck N, Thys K, Gevers T, Vranckx L, Lounis N, de  
662 Jong BC, Koul A.** 2014. Acquired resistance of *Mycobacterium tuberculosis* to  
663 bedaquiline. *PLOS one* **9**:e102135.
- 664 31. **Ismail NA, Omar SV, Joseph L, Govender N, Blows L, Ismail F, Koornhof H,  
665 Dreyer AW, Kaniga K, Ndjeka N.** 2018. Defining Bedaquiline Susceptibility,  
666 Resistance, Cross-Resistance and Associated Genetic Determinants: A  
667 Retrospective Cohort Study. *EBioMedicine* doi:10.1016/j.ebiom.2018.01.005.
- 668 32. **Villellas C, Coeck N, Meehan CJ, Lounis N, de Jong B, Rigouts L, Andries K.**  
669 2016. Unexpected high prevalence of resistance-associated Rv0678 variants in  
670 MDR-TB patients without documented prior use of clofazimine or bedaquiline. *J*  
671 *Antimicrob Chemother* doi:10.1093/jac/dkw502.
- 672 33. **World Health Organization.** 2018. Technical Report on critical concentrations  
673 for drug susceptibility testing of medicines used in the treatment of drug-resistant  
674 tuberculosis. Geneva **WHO/CDS/TB/2018.5**.
- 675 34. **Yu XL, Lu L, Chen GZ, Liu ZG, Lei H, Song YZ, Zhang SL.** 2014.  
676 Identification and characterization of non-tuberculous mycobacteria isolated from  
677 tuberculosis suspects in Southern-central China. *PLoS One* **9**:e114353.
